# Supplementary material
Source: PubMed Central journal article supplement (PMC2409019)
Supplement: pp.108.119511_1.pdf [file pp.108.119511_1.pdf]

**Rudd et al.,**

**Supplementary Table 1.** The primers sequences used in the Real-Time RT-PCR assays. The primers were designed against either full length cDNA sequences present in Genbank or against Affymetrix Id probe sets\*

| Gene (accession no.)                    | Forward primer            | Reverse primer          |
|-----------------------------------------|---------------------------|-------------------------|
| TaMPK3 (AY079318)<br>Ta.236.1.S1_at*    | TACATGAGGCACCTGCCGCAGT    | GGTTCAACTCCAGGGCTTCGTTG |
| TaMPK6 (AY173962)<br>Ta.23916.1.S1_at*  | GAAGATATATCCGCCAACTTCCCCG | CGCATGCTGCTCGAAGTCAAAGC |
| Beta-tubulin (U76744)<br>Ta.212.1.S1_a* | GCTCACATCTCGTGGGTACAGA    | CGCCAGTGTACCAATGCAAGAAA |
