# Supplementary material
Source: PubMed Central journal article supplement (PMC2409019)
Supplement: pp.108.119511_2.pdf [file pp.108.119511_2.pdf]

## Rudd et al., Supplementary Figure S1

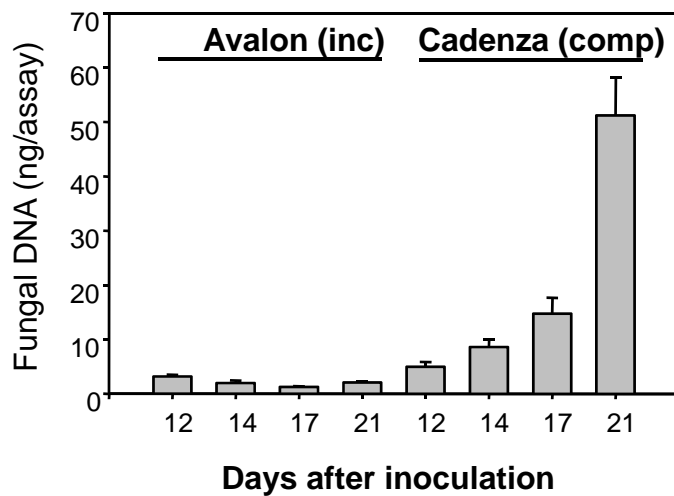

### Supplementary Figure 1.

Quantification of fungal biomass in cv Cadenza and cv. Avalon following inoculation with *M. graminicola* isolate IPO88004. Leaf material was taken from plants at various stages of symptom development (12, 14, 17 and 21 days after inoculation). Quantitative Real-Time PCR was done on fungal genomic DNA present in the leaf tissue. The figure demonstrates the specific resistance of cv. Avalon (conferred by resistance gene *Stb15*) and susceptibility of cultivar Cadenza. These resistance phenotypes are the opposite of those described towards isolate IPO323 (Fig. 1).
