# Supplementary material
Source: PubMed Central journal article supplement (PMC2409019)
Supplement: pp.108.119511_3.pdf [file pp.108.119511_3.pdf]

## Rudd et al., Supplementary figure S2

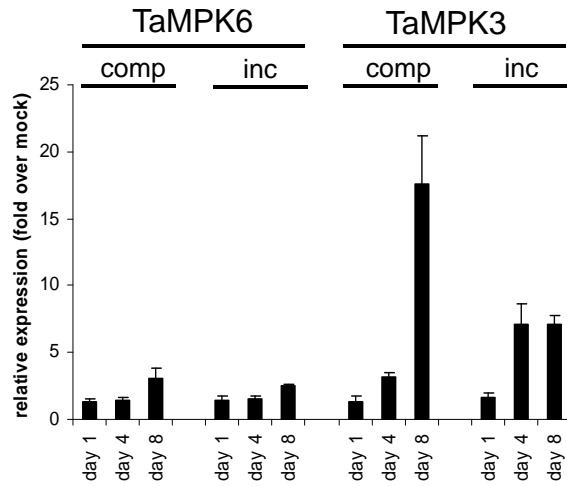

### Supplementary Figure 2.

Real-Time sybr-green PCR analysis of TaMPK3 and TaMPK6 expression at 1, 4 and 8 days after inoculation of wheat cv. Avalon with isolate IPO323 (incompatible- inc) or isolate IPO88004 (compatible- comp). Expression levels are shown relative to that of the wheat beta-tubulin gene.
