# Supplementary material
Source: PubMed Central journal article supplement (PMC2409019)
Supplement: pp.108.119511_4.pdf [file pp.108.119511_4.pdf]

## Rudd et al., Supplementary Figure S3

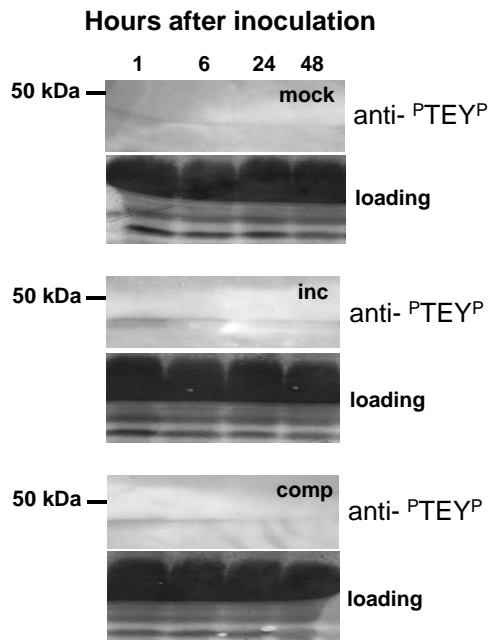

### Supplementary Figure 3.

Western blot analysis of MAPK activity levels during the early time points following mock, fungal compatible (comp) and fungal incompatible (inc) inoculations. Extracts were probed with the anti-<sup>P</sup>TEY<sup>P</sup> antiserum and relative protein loading is shown for the 60 kDa region. The figure illustrates that no strong increases in overall MAPK activity are detected within the early time points of either compatible or incompatible interactions
